# Supplementary material
Source: PubMed Central journal article supplement (PMC5535041)
Supplement: 10.1074_M117.783985_jbc.M117.783985-1.pdf [file 10.1074_M117.783985_jbc.M117.783985-1.pdf]

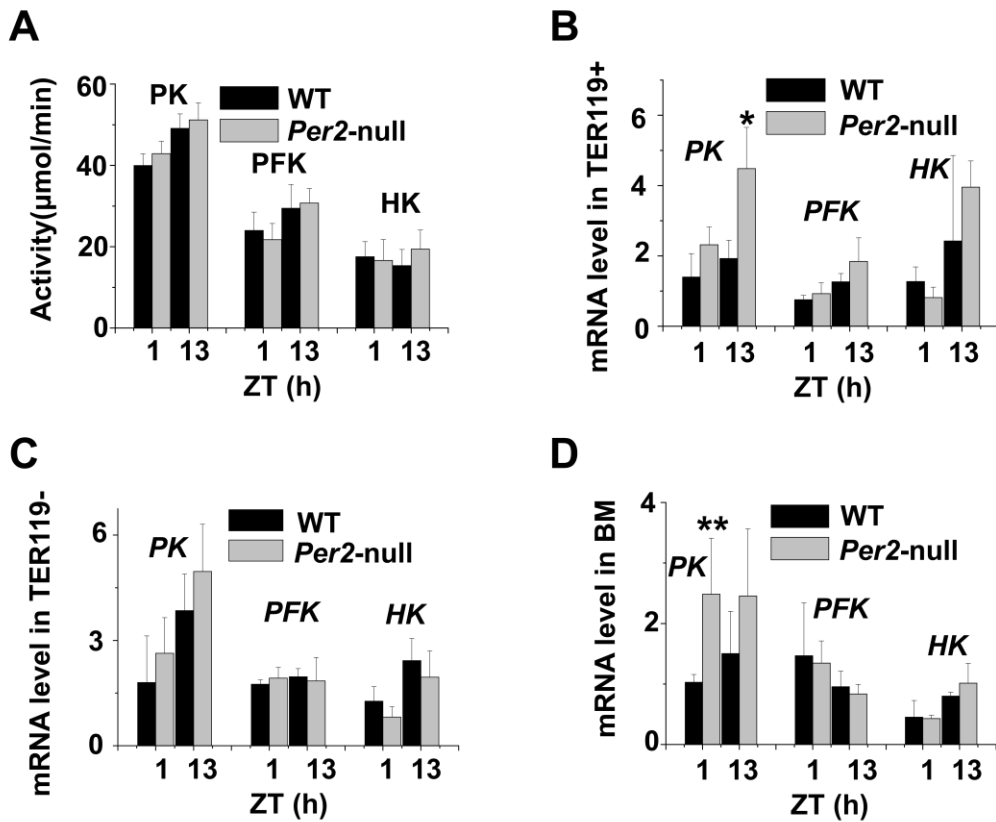

**Figure S1**

**Supplement Figure S1 Glycolysis is normal in *Per2*-null RBCs.** (A) The activity of glycolysis rate limiting enzyme PK, PFK and HK in WT and *Per2*-null RBCs at ZT1 and ZT13. The mRNA expression of *Pk*, *Pfk* and *Hk* was detected in Ter119+ (B), Ter119-(C) and BM (D) of WT and *Per2*-null mice at ZT1 and ZT13. All data  $X \pm \text{SEM}$ ;  $n=6$  in each group, \* $p < 0.05$ , \*\* $p < 0.01$ .
