# Supplementary material
Source: PubMed Central journal article supplement (PMC5535041)
Supplement: 10.1074_M117.783985_jbc.M117.783985-2.pdf [file 10.1074_M117.783985_jbc.M117.783985-2.pdf]

**A**

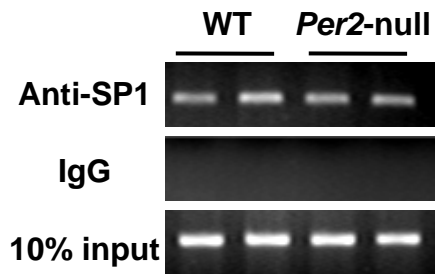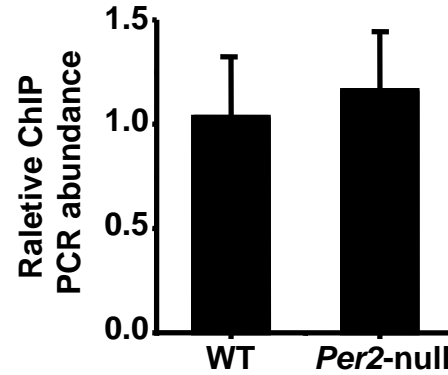

**Supplement Figure 2 Effect of *Per2* deficiency on recruitment of SP1 to *Atp1a1* promoter.** (A) Quantitative PCR amplification of *Atp1a1* promoter detected by a ChIP assay in WT and *Per2*-null bone marrow cells. All data  $\bar{X} \pm \text{SD}$ ; n=4 in each group, \* $p < 0.05$ .
